# Supplementary material for: Role of Interleukin 36 in Generalised Pustular Psoriasis and Beyond
Source: Springer Nature journal article supplement (doi:10.1007/s13555-021-00677-8), 2022-01-21
Supplement: MOESM1 [file 20056170]

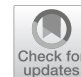

REVIEW

## 膿疱性乾癬（汎発型）およびその他の疾患におけるインターロイキン 36 の役割

# Role of Interleukin 36 in Generalised Pustular Psoriasis and Beyond

Kazumitsu Sugiura (杉浦 一充)

### 抄録

膿疱性乾癬（汎発型）（GPP）は無菌性膿疱が突然かつ広範囲に出現する重度の好中球性皮膚疾患で、治療選択肢が限られているため今なお治療に難渋する疾患である。近年、GPP と関連する遺伝子変異が発見され、自己炎症が起こる分子メカニズムに対する理解が深まったことにより、GPP の発症および進行を促す主要なサイトカインが同定された。その中で、インターロイキン（IL）-36 が、炎症誘発性サイトカインの過剰な活性化を統合し、免疫細胞を刺激することにより、GPP の皮膚病変部に特徴的な好中球浸潤を引き起こすなど、

ハブとして機能することを示すエビデンスが集積されつつある。これらの知見により、IL-36 経路をブロックし、免疫関連の病原性機序と炎症誘発性サイトカインの作用を抑える新規の GPP 標的治療薬の創出・開発への道が開かれつつある。本稿では、IL-36 が GPP の発症機序においてハブとして機能することを支持する現時点でのエビデンスを総括する。

**キーワード：**自己炎症性角化症・膿疱性乾癬（汎発型）・炎症・インターロイキン 36・好中球・膿疱

---

K. Sugiura (✉)  
Department of Dermatology, Fujita Health  
University School of Medicine, Toyoake, Japan  
e-mail: ksugiura@fujita-hu.ac.jp

## 要 点

膿疱性乾癬（汎発型）（GPP）は、無菌性膿疱が突然かつ広範囲に出現し、全身性炎症を伴うこともある重度の好中球性皮膚疾患で、尋常性乾癬とは異なる疾患と考えられる。

GPP 患者において、インターロイキン（IL）-36 受容体拮抗因子の機能喪失型変異や IL-36 の過剰発現など、IL-36 サイトカインファミリーの遺伝子変異が確認されている。このような遺伝子変異は炎症カスケードを誘発・維持し、皮膚において特に好中球などの免疫細胞の活性化と浸潤を引き起こす。

GPP の発症機序の分子メカニズムに対する理解が深まり、臨床的妥当性が確認された新たな薬物療法の標的が発見された結果、IL-36 が GPP の発症および進行を促すハブと考えられる。

GPP およびその他の自己炎症性皮膚疾患に対する IL-36 を標的とした革新的治療薬は、これまでアンメットメディカルニーズとして扱われてきたが、現在その開発が進められている。

## 緒言

膿疱性乾癬（汎発型）（GPP）は重度の好中球性皮膚疾患で、無菌性膿疱が突然かつ広範囲に出現し、症例によっては全身性炎症を伴う [1]。GPP には尋常性乾癬が先行して発症する例と尋常性乾癬の既往なく発症する例がある。GPP はその臨床経過から再発性のものと持続性のものに分けられる。GPP フレアは重度の全身性合併症をきたすことがあり、治療しないと生命を脅かすおそれがある [2]。

GPP は尋常性乾癬とは異なる疾患と考えられ

る。乾癬は通常、尋常性乾癬、psoriasis inversa、滴状乾癬、乾癬性紅皮症および膿疱性乾癬など、いくつかのサブタイプに分類される。この他に乾癬性関節炎というサブタイプがあり、これは関節の炎症、腱付着部炎、指炎、乾癬および爪病変を合併する炎症性関節炎である [3]。GPP は膿疱性乾癬の病型の 1 つである [4,5]。GPP は、尋常性乾癬との関連により、尋常性乾癬を伴うタイプと伴わないタイプに分けられる [6]。尋常性乾癬を伴わない GPP（GPP alone）の大半は、主として、インターロイキン（IL）-36 受容体アンタゴニスト（IL-36Ra）をコードする *IL36RN* 遺伝子のホモ接合性変異または複合ヘテロ接合性変異によるものである。尋常性乾癬を伴う GPP でも *IL36RN* 遺伝子の変異を有する患者が少数認められる [7]。日本の GPP 診療ガイドラインでは、GPP 確定診断基準を、全身症状を伴うこと、無菌性膿疱が多発し、ときに融合し膿海を形成すること、病理組織学的に Kogoj 海綿状膿疱を特徴とする好中球性角層下膿疱を証明すること、これらが再発すること、の 4 項目を満たすとしている [8]。

近年、GPP 発症の分子病態に対する理解が深まったことにより、自己炎症と自己免疫の混在する病理学的機序を有し、IL-36Ra 関連膿疱症、CARD14 関連乾癬、毛孔性紅色枇糠疹 5 型および familial keratosis lichenoides chronica を包括する疾患に対して、「自己炎症性角化症（autoinflammatory keratinisation diseases）」という名称が提唱された。尋常性乾癬と関連なく発症するタイプの GPP は、自己炎症性角化症とみなすことができる [9,10]。

本稿では、GPP の発症機序における IL-36 の役割、ならびに下流のサイトカインの作用を統合するハブとしての機能について概説する。本稿は過去に実施した試験に基づくものであり、著者が被験者または動物を対象に新たに実施した試験は含まれていない。

表 1 日本のガイドラインに基づく GPP に対する治療選択肢

| 薬剤の種類                 | 薬剤                    | 作用機序                                                                                                                                             |
|-----------------------|-----------------------|--------------------------------------------------------------------------------------------------------------------------------------------------|
| 生物学的製剤以外の<br>経口薬      | エトレチナート               | 皮膚の角化と表皮細胞の増殖を抑制することにより作用し、TNF- $\alpha$ 、IL-1 および IL-6 などの炎症促進性サイトカインの産生を阻害すると考えられる [57]                                                        |
|                       | シクロスポリン               | カルシニューリンを阻害することにより T 細胞による炎症性サイトカイン産生を抑制する [57]                                                                                                  |
|                       | メトトレキサート              | ケラチノサイトの DNA 合成を阻害し、そのアポトーシスを誘導すると考えられる [2]。乾癬における研究結果から、mTOR 経路を阻害することにより Treg の免疫抑制機能を回復させると考えられる [58,59]                                      |
| 生物学的製剤以外の<br>経口または外用薬 | 副腎皮質ステロイド薬            | 糖質コルチコイド受容体を刺激して、炎症抑制因子 (IL-Ra および I $\kappa$ B- $\alpha$ など) の遺伝子転写を促進し、炎症促進因子 (サイトカイン、増殖因子、接着分子、一酸化窒素、プロスタノイドおよびその他のオータコイドなど) の遺伝子転写を抑制する [60] |
| 非薬物療法                 | 顆粒球単球吸着除去療法           | 骨髓系白血球を選択的に除去する [61]                                                                                                                             |
| 生物学的製剤以外の<br>外用薬      | 活性型ビタミン D3 外用薬        | ケラチノサイトに発現するビタミン D 受容体を介して作用し、ケラチノサイトの炎症制御に関わる遺伝子の転写を促進する [62]                                                                                   |
| 局所療法                  | ソラレン+ UVA (PUVA) 照射療法 | 乾癬病変部におけるサイトカイン活性を変化させる [63]                                                                                                                     |
|                       | ナローバンド UVB 照射療法       | UVB のうち 311 nm 前後の幅の狭い波長域のみを照射する療法 [64]                                                                                                          |
| 生物学的製剤の全身<br>投与       | インフリキシマブ              | TNF- $\alpha$ をブロックするモノクローナル抗体 [21]                                                                                                              |
|                       | アダリムマブ                | TNF- $\alpha$ をブロックするモノクローナル抗体 [65]                                                                                                              |
|                       | セクキヌマブ                | IL-17A に結合するモノクローナル抗体 [12]                                                                                                                       |
|                       | イキシズマブ                | IL-17A に結合するモノクローナル抗体 [13]                                                                                                                       |
|                       | プロダルマブ                | IL-17 受容体に結合するモノクローナル抗体 [16]                                                                                                                     |
|                       | グセルクマブ                | IL-23 の p19 サブユニットに結合するモノクローナル抗体 [14]                                                                                                            |
|                       | リサンキズマブ               | IL-23 の p19 サブユニットに結合するモノクローナル抗体 [66,67]                                                                                                         |

I $\kappa$ B : NF- $\kappa$ B インヒビター、IL : インターロイキン、mTOR : 哺乳類ラパマイシン標的タンパク質、PUVA : ソラレン+ UVA、TNF : 腫瘍壊死因子、Treg : 制御性 T 細胞、UV : 紫外線

表2 GPP における遺伝子変異

| 遺伝子           | 変異                                                                                                                                                                                                                                                                                                          | GPP の発症機序における役割                                                                                                                                                                                                                                                                                                 |
|---------------|-------------------------------------------------------------------------------------------------------------------------------------------------------------------------------------------------------------------------------------------------------------------------------------------------------------|-----------------------------------------------------------------------------------------------------------------------------------------------------------------------------------------------------------------------------------------------------------------------------------------------------------------|
| <i>IL36RN</i> | ホモ接合性ミスセンス変異 c.80T>C (p.Leu27Pro) などの機能喪失型変異がいくつか確認されている [6]。この他、東アジア系の患者で、c.28C>T (p.Arg10X)、c.104A>G (p.Lys35Arg)、c.140A>G (p.Asn47Ser)、c.227C>T (p.Pro76Leu)、c.304C>T (p.Arg102Trp)、c.305G>A (p.Arg102Gln)、c.368C>G (p.Thr123Arg)、c.368C>T (p.Thr123Met) および c.115+6T>C (p.Arg10ArgfsX1) などの変異が確認された [6] | ケラチノサイトにおける炎症性サイトカイン (IL-8、IL-36 $\alpha$ 、IL-36 $\beta$ および IL-36 $\gamma$ など) の発現亢進 [68]<br><br>尋常性乾癬と関連なく発症する GPP は <i>IL36RN</i> のホモ接合性変異または複合ヘテロ接合性変異によって発症する [68]                                                                                                                                         |
| <i>CARD14</i> | c.526G>C<br><br>欧州系の乾癬患者でヘテロ接合性変異 c.349G>A (p.Gly117Ser) および c.349+5G>A が確認され、小児 GPP 孤発例で c.413A>C (p.Glu138Ala) が確認された [6]                                                                                                                                                                                 | <i>CARD14</i> は、ケラチノサイトにおいて TRAF2 依存性 NF- $\kappa$ B シグナル伝達を活性化するタンパク質 <i>CARD14</i> をコードする [6]<br><br>日本人患者で尋常性乾癬が先行する GPP の有意なリスク因子であるが、尋常性乾癬が先行しない GPP のリスク因子ではない [69]<br><br>欧州系の乾癬患者でヘテロ接合性変異 c.349G>A (p.Gly117Ser) および c.349+5G>A が確認された [6]<br><br>小児 GPP 孤発例で c.413A>C (p.Glu138Ala) バリエーションが確認された [6] |
| <i>AP1S3</i>  | <i>IL36RN</i> 遺伝子および <i>CARD14</i> 遺伝子に変異のない膿疱性乾癬の各種病型 (PPP、ACH および GPP) の欧州の患者 15 例で、 <i>AP1S3</i> 遺伝子にヘテロ接合性ミスセンス変異 c.11T>G (p.Phe4Cys) および c.97C>T (p.Arg33Trp) が確認された [6]                                                                                                                               | <i>AP1S3</i> は AP-1 のコアサブユニット $\sigma$ 1C をコードし、トランス・ゴルジネットワークとエンドソームの間の細胞内小胞輸送に関与する AP-1 ヘテロテトラマーの安定化に関わる [6]<br><br><i>AP1S3</i> の機能喪失型変異が GPP と関連する [6]                                                                                                                                                      |
| <i>MPO</i>    | GPP または APP の患者で <i>MPO</i> のイントロン 11 の 3' 末端に A-C 転移によるホモ接合性変異 c.2031-2A>C が確認された [6]                                                                                                                                                                                                                      | <i>MPO</i> はミエロペルオキシダーゼ (好中球の好アズール性顆粒に含まれるリソソームヘムタンパク質) をコードする [6]<br><br><i>In vitro</i> での機能解析で <i>MPO</i> 変異が好中球浸潤と好中球活性化を促進するとともに PMA による好中球のアポトーシスを抑制することが示され、 <i>MPO</i> 変異が GPP の発症に関与することが示唆された [6]                                                                                                     |

表 2 (続き)

| 遺伝子             | 変異                                                    | GPP の発症機序における役割                                                                                                                                                           |
|-----------------|-------------------------------------------------------|---------------------------------------------------------------------------------------------------------------------------------------------------------------------------|
| <i>SERPINA3</i> | GPP 患者 2 例でヘテロ接合性欠失 c.966delT/p.Tyr322Ter が確認された [20] | <i>SERPINA3</i> は、GPP 患者で数種のプロテアーゼを阻害するセリンプロテアーゼインヒビター A3 (serpin A3) をコードする [20]<br><br>GPP における <i>SERPINA3</i> の機能喪失型変異は、カテプシン G に対する serpin A3 の阻害作用を減弱させると考えられる [20] |

ACH：アロポー稽留性肢端皮膚炎、AP-1：アダプタータンパク質複合体 1、APP：環状膿疱性乾癬、CARD14：caspase recruitment domain family member 14、GPP：膿疱性乾癬（汎発型）、IL：インターロイキン、NF- $\kappa$ B：核内因子 $\kappa$ B、PMA：ホルボールミリストアセタート、PPP：掌蹠膿疱症

## GPP の治療

米国および欧州で承認されている GPP の治療法はない。しかも、現在実施されている治療を支持するエビデンスは確かなものではなく、主に症例報告や小規模の非盲検非ランダム化試験に基づくものである [2,11]。日本では現在、GPP 治療薬として生物学的製剤がいくつか承認されており、これには腫瘍壊死因子 (TNF) 阻害薬であるアダリムマブ、インフリキシマブおよびセルトリズマブペゴル、IL-17/IL-17R に拮抗するモノクローナル抗体製剤であるセクキヌマブ、プロダルマブおよびイキセキズマブ、IL-23 阻害薬であるリサンキズマブおよびグセルクマブが含まれる。台湾およびタイでは、生物学的製剤のうちプロダルマブのみが承認されている [8,12-18]。日本における現在の GPP 治療選択肢を表 1 にまとめる。

## GPP の発症機序におけるサイトカインの役割

GPP の発症機序は明らかではない。最近の研究で、*IL36RN*、*CARD14*、*AP1S3* および *MPO* 遺伝子に GPP と関連する変異がいくつか同定された (表 2)。これらの遺伝子は主要な炎症・免疫経路の制御に関わるもので、このうち GPP 発症に特に重要なのが IL-1/IL-36 – ケモカイン – 好中球という経路である [6,19]。さらに、GPP 患者では、数種のプロテアーゼを阻害するセリンプロテアー

ゼインヒビター A3 (serpin A3) をコードする *SERPINA3* 遺伝子に非常にまれな機能喪失型変異が確認された。具体的には、サンガー法を用いた遺伝子解析により、GPP 患者 2 例でヘテロ接合性欠失 c.966delT/p.Tyr322Ter が確認された。この非常にまれな遺伝子変異は GPP と有意な相関を示しており、IL-36 とその下流の炎症誘発性サイトカインの活性化に関わるカテプシン G に対する serpin A3 の阻害作用を減弱させるものと考えられる [20]。

また、最近の研究で、IL-1 および IL-36 の持続的活性化がケモカイン産生、好中球浸潤および膿疱形成を促し、GPP の発症に関与していることが確認された [21]。IL-36 サブファミリーは IL-1 スーパーファミリーの一部であり、IL-36 受容体 (IL-36R) を刺激する IL-36 $\alpha$ 、IL-36 $\beta$  および IL-36 $\gamma$  という 3 つの炎症誘発性アゴニストと 1 つのアンタゴニスト (IL-36Ra) から構成される。IL-36 サブファミリーに属するサイトカインは、上皮細胞、樹状細胞、好中球間のシグナル伝達に重要な役割を果たしており、炎症の誘導、持続および悪化の原因となるハブとして機能する [22]。

IL-1 ファミリーに属する遺伝子はヒトの 2 番染色体上に 1 個のクラスターを形成しており、これらの遺伝子は IL-1 ファミリーのプロトタイプである IL-1 $\beta$  遺伝子から遺伝子重複を経て形成されたと推定されている。IL-1 ファミリーには IL-1 $\beta$ 、IL-1 $\alpha$ 、IL-36 $\alpha$ 、IL-36 $\beta$ 、IL-36 $\gamma$ 、IL-36Ra、

表3 GPPの発症機序に関与するIL-1ファミリーメンバーの概要

| サイトカイン                                            | 受容体               | GPPの発症機序における役割                                                                                                                                                  |
|---------------------------------------------------|-------------------|-----------------------------------------------------------------------------------------------------------------------------------------------------------------|
| IL-1 $\beta$                                      | IL-1R1            | IL-1 $\beta$ を介するパラクリン型シグナル伝達ネットワークは炎症促進経路を活性化する [10]                                                                                                           |
| IL-18                                             | IL-18Ra           | IL-18は表皮ケラチノサイトで発現するインフラマソームの構成分子の1つで、表皮および真皮浅層においてパラクリン型炎症促進性シグナル伝達ネットワークを活性化する [10]                                                                           |
| IL-36 $\alpha$<br>IL-36 $\beta$<br>IL-36 $\gamma$ | IL-36R (IL-1Rrp2) | ケラチノサイトから分泌されたIL-36が真皮中の好中球および樹状細胞を活性化する。さらに、ケラチノサイトがオートクリン型刺激により、IL-36、IL-8、CXCL1、CXCL2およびCCL20を分泌し、これがさらに炎症促進経路を活性化する [10]                                    |
| IL-38                                             | IL-36R (IL-1Rrp2) | IL-38はIL-1Ra (IL-1アンタゴニスト) およびIL-36Ra (IL-36アンタゴニスト) と40%の配列類似性を有する17~18 kDaのタンパク質で、IL-36Rに結合してIL-36の作用に拮抗する。IL-38は主に皮膚および免疫細胞に発現し、その発現は炎症性サイトカインによって抑制される [70] |
| IL-1Ra                                            | IL-1R1            | IL-1Raをコードする <i>IL1RN</i> 遺伝子に機能喪失型変異があるとIL-1Raタンパク質の一部または全部が欠損し、IL-1 $\alpha$ およびIL-1 $\beta$ の活性を制御できなくなる [71,72]                                             |
| IL-36Ra                                           | IL-36R            | <i>IL36RN</i> 遺伝子の機能喪失型変異によって生じるIL-36Ra欠損の結果として、IL-36による皮膚の炎症が加速すると考えられる [10]                                                                                   |

IL：インターロイキン

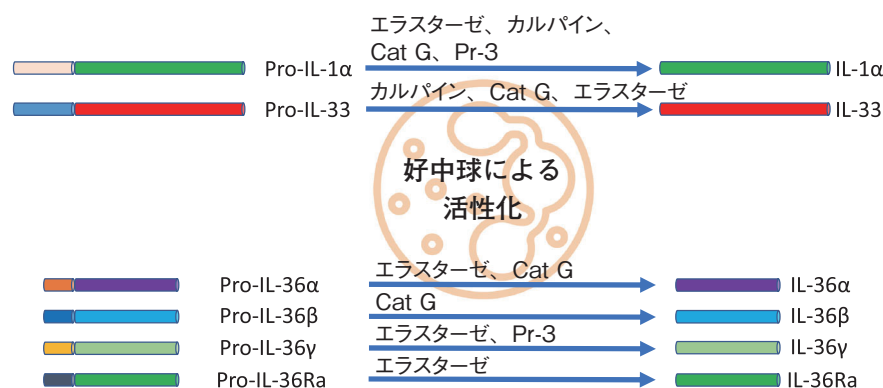

図1 好中球によるIL-1/IL-36の活性化[22,26,73,74]。Cat G：カテプシン G、IL：インターロイキン、Pr-3：プロテイナーゼ-3

IL-37、IL-38 および IL-1Ra が含まれており、つまり IL-36 はこのファミリーに属する (表3) [23]。これらの知見の裏づけとして、Yamamoto らは、IL-1 $\beta$ 、IL-1Ra、IL-6、IL-10、IL-12p70、IL-18、IL-22、インターフェロン (IFN)- $\gamma$  および血管内皮増殖因子の血清中濃度が、GPP の重症度スコア、白血球数および血清 C 反応性蛋白濃度といった GPP の臨床マーカーと正の相関を示すことを報告

した [24]。IL-36 サイトカインを活性化するためには、活性化した好中球から分泌されるプロテアーゼによって前駆体タンパク質を切断する必要がある。カテプシン G、エラスターゼおよびプロテイナーゼ-3 は IL-36 ファミリーのタンパク質に対して様々なプロセッシングを施し、IL-36 $\alpha$ 、IL-36 $\beta$ 、IL-36 $\gamma$  の3種類すべてを活性化する。したがって、好中球由来のプロテアーゼは細胞外サイトカイン

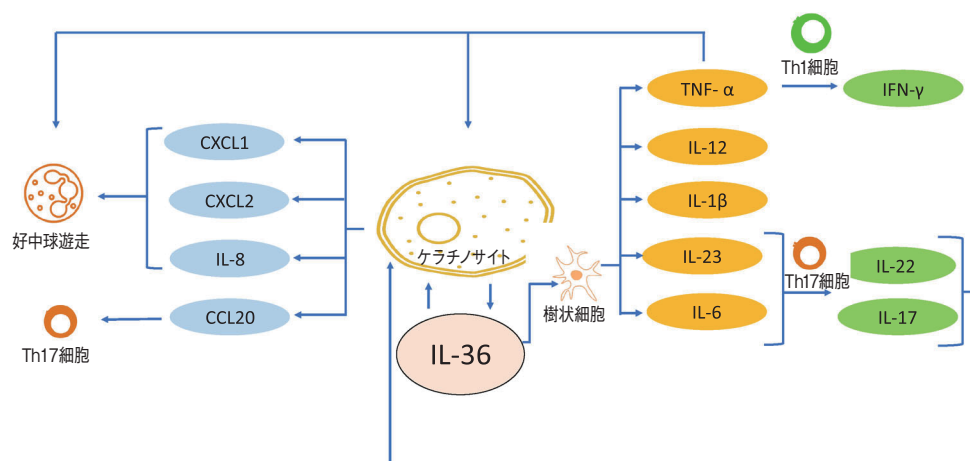

**図2** GPPの発症機序におけるIL-36のハブとしての役割。IL-36はGPPの発症機序においてハブとして作用するサイトカインである。GPPでは、*IL36RN*遺伝子の変異によるIL-36の過剰発現または相対的な活性化の結果、IL-36経路が過剰に活性化する[9,10]。GPP:膿疱性乾癬(汎発型)、IFN:インターフェロン、IL:インターロイキン、Th17:17型ヘルパーT、TNF:腫瘍壊死因子

のプロセッシングを通じて炎症を増強する作用を有する(図1)[25]。Clancyらは、活性化した好中球から細胞外に分泌されるプロテアーゼがIL-1 $\alpha$ 、IL-1 $\beta$ 、IL-33、IL-36 $\alpha$ 、IL-36 $\beta$ およびIL-36 $\gamma$ の活性化レベルを調節する強力な因子であることを示し、上記の知見をさらに裏づけた。このように好中球は、IL-1ファミリーに属する複数のサイトカインのプロセッシングを通して、炎症反応の調節に重要な役割を果たしている(図1)[26]。

IL-36がGPPの発症機序においてハブとして機能していることは、いくつかの研究で確認されている。IL-36Rの相対的活性化が持続すると転写因子NF- $\kappa$ Bが活性化し、CXCL8、TNF- $\alpha$ 、IL-1およびIL-23などのいくつかの重要な炎症性サイトカインが大量に生成する[21,27-29]。しかも、膿疱性乾癬患者ではIL-17の血清濃度およびそのmRNAレベルが明らかに上昇している[30]。いくつかのIL-17A阻害薬がGPP患者で奏効したことから、IL-17ファミリーの中で最も活性の高いIL-17AがGPP発症に関与していることが認められた(図2)[15,31]。

## IL-36の家族性遺伝子変異とGPP

GPPの家族内発生は1972年にLandryとMuller

が初めて報告した。報告によると、患者とその母方の叔父2人および祖母がGPPを発症し、その時期は乳幼児期とのことであった。GPPの症状はレンサ球菌感染によって悪化した[32]。その後、GPP患者で、1.2 Mbの染色体2q13-q14.1領域および*IL36RN*のホモ接合性ミスセンス変異との有意な関連が認められ、GPP発症におけるIL-36経路の関与がさらに確実なものとなった[33]。疱疹状膿疱疹(妊婦に発生し、GPPと同様の臨床症状および組織学的所見を伴う稀少な膿疱性皮膚疾患)の症例でも、*IL36RN*のホモ接合性変異およびヘテロ接合性変異が確認された[6]。また、Sawabeらは最近の症例報告では*IL36RN*変異と*CARD14*変異の両方を保有するGPP診断例1例が報告され、*IL36RN*と*CARD14*の同時変異もGPP発症の素因であることが示唆された[34]。また、非血縁関係にあるGPP患者5例のエクソーム解析で*IL36RN*の機能喪失がGPPの遺伝的素因であることが明らかにされ、IL-36経路の役割がさらに確かなものとされた。このことから、重度の再発性炎症性疾患であるGPPに自然免疫の制御異常が関与していることが示唆され、IL-1シグナル伝達が治療標的になり得ると考えられた[35]。

GPPでは、IL-36シグナル伝達の相対的な過剰活性化が、抗原に対する17型ヘルパーT(Th17)

細胞の反応を刺激し、Th17 細胞の抗原誘発免疫応答を促す。これにより外因性誘発因子なしに自己免疫反応が誘発される可能性がある [36]。IL-36 経路を阻害する薬剤（スベソリマブおよびイムシドリマブなど）が開発されたことで、IL-36 経路が GPP 発症の促進において中心的役割を果たしていることがさらに確認された。抗 IL36R モノクローナル抗体製剤であるスベソリマブは、急性期 GPP 患者 7 例を対象とした非盲検概念実証試験および急性期 GPP 患者 53 例を対象としたランダム化プラセボ対照二重盲検比較試験（Effisayil™ 1）において有効性が示され、IL-36 経路が様々な遺伝的背景を有する GPP 患者においてその発症を促している可能性がある [37]。同じく抗 IL36R モノクローナル抗体製剤であるイムシドリマブの GPP 患者 8 例を対象とした非盲検試験の中間解析の結果からも、IL-36 が GPP の発症機序において中心的役割を果たしていることが支持されている [38]。

## GPP の発症機序における IL-36 のハブとしての機能

最近のトランスジェニックマウスおよびノックアウトマウスを用いた *in vivo* の前臨床試験において、IL-36 シグナル伝達が乾癬病変の発生に重要な役割を果たしていることが示された。すなわち、IL-36 ノックアウトマウス (*IL-36R*<sup>-/-</sup>;K5.Stat3C マウス) で、IL-23/IL-17 系サイトカインなどの乾癬に関連するサイトカインの遺伝子発現の抑制が認められた。しかも、*in vitro* で IL-36 欠損ケラチノサイトを D-グルカンで刺激しても、通常であれば起こる IL-36 サブファミリーのメンバー、S100A8、S100A9 および IL-17C の発現亢進が起こらなかった。以上のことから、IL-36 シグナル伝達は自然免疫を乾癬発症と結びつけるゲートキーパーとして機能していると考えられた [39]。これをさらに支持する知見として、Wang ら [40] は、IL-36 $\gamma$  が乾癬において Wnt シグナル伝達経路を介してケラチノサイトの分化を阻害し、炎症を誘発することを示した。これらの知見は臨床的に意義がある。乾癬患者 40 例の乾癬病変と、マッチングした対照群の組織を免疫組

織化学的に比較した後ろ向き研究において、乾癬患者では基底上表皮層内（4 層以上）のケラチノサイト核内で IL-36 $\gamma$  が強く発現していたのに対して、対照群の全例では基底層内の細胞質で弱い発現を示しただけであった。しかも、IL-36 $\gamma$  の発現上昇は乾癬の重症度と有意な相関を示した [41]。

IL-36 サイトカインは、好中球および Th17 細胞の乾癬病変皮膚への遊走と活性化に中心的役割を果たしている。IL-36 サイトカインはケモカインや、表皮の分化/角化を阻害するサイトカインの産生を誘導し、病的血管新生および内皮細胞活性化を促す。IL-36 サイトカインの発現は乾癬病変表皮で亢進しており、TNF- $\alpha$  および IL-17 によって強く誘導される [42]。これらの知見は新規 GPP 治療薬の創出につながり得る。低分子薬のハイスループットスクリーニングの結果、A-552 がヒト IL-36 $\gamma$  に対する強力な拮抗薬として同定されたが、同じファミリーに属する近縁のサイトカイン IL-36 $\alpha$  には拮抗作用を示さなかった。A-552 は、マウスおよびヒトの乾癬皮膚モデルで IL-36 $\gamma$  に誘導される反応を抑制した [43]。最近の研究によると、IL-36 は乾癬皮膚病変の形成に関わるだけでなく、GPP および尋常性乾癬の皮膚外合併症の発症にも関わる可能性がある。GPP 患者には際立った I 型 IFN の影響があり、これと異常な IL-36 活性との間に相関があることが報告された [44]。IL-36 受容体拮抗因子欠損 (DITRA) マウスモデルを用いた *in vivo* 研究でも、IL-36 経路が皮膚の炎症促進および腸管上皮バリア機能に必須であることが示された [45]。

さらに最近、マウスを用いた研究において、受容体拮抗因子であり IL-1 ファミリーに属する IL-37 が Toll 様受容体 4 (TLR4) シグナル伝達の活性化を抑制することが示された [46]。Shibata らは、*IL-36RN*<sup>-/-</sup> マウス (DITRA に伴う自己炎症性症候群のモデル) に対して TLR4 阻害薬の TAK-242 を投与して TLR4 シグナル伝達をブロックしたところ、皮膚、関節および肝臓の自己炎症症状が消失したことを報告した。このことから IL-36 経路が中心的役割を果たしていることがさらに強く示され、GPP に対する新たな治療戦略が示唆された [46,47]。

## 他の皮膚疾患における IL-36 経路の役割

IL-1 ファミリーに属する IL-36 $\alpha$  (IL-1F6)、IL-36 $\beta$  (IL-1F8) および IL-36 $\gamma$  (IL-1F9) と受容体拮抗因子 IL-36Ra (IL-1F5) は、皮膚炎症の活性制御において中心的役割を果たしている。加えて、IL-36 $\alpha$  で処理した単球由来樹状細胞 (MO-DC) は同種異系 CD4 陽性 T 細胞の増殖を促進したことから、IL-36 は樹状細胞の成熟および機能を刺激して、T 細胞の増殖を促進し得ると考えられた。これらのデータから、IL-36 サイトカインはケラチノサイト、抗原提示細胞 (APC) および間接的ながら T 細胞の活性化を介して皮膚炎症の拡大を促すことが示唆される [48]。IL-36 は皮膚感染症でも役割を果たしていると考えられ、誘発因子のうち微生物感染、特に黄色ブドウ球菌感染は、炎症誘発性の IL-36 サイトカインの産生を亢進し、皮膚病変の炎症を誘発・促進する [29]。

IL-36 ファミリーメンバーの発現上昇は、Netherton 症候群の発症機序で重要な役割を果たしていることが明らかにされている。Netherton 症候群は、リンパ上皮 Kazal 型関連阻害因子 (LEKTI) タンパク質をコードする *SPINK5* 遺伝子の機能喪失型変異によって生じる稀少な常染色体劣性遺伝性皮膚疾患で、この変異の結果、表皮のカリクレイン関連ペプチダーゼ (KLK)、特に KLK5、KLK7 および KLK14 が相対的に活性化する [49]。

IL-36 は、乾癬だけでなくアレルギー性接触皮膚炎 (ACD) の発症機序における役割も解析されている。ACD の皮膚病変では 3 つの IL-36 アゴニストすべての遺伝子発現が亢進していたが、IL-36Ra の遺伝子発現亢進は認められなかった。さらに、*ex vivo* モデルで皮膚移植片を組み換え IL-36Ra で処理すると、IL-36 $\alpha$ 、IL-36 $\beta$  および IL-36 $\gamma$  の遺伝子発現が低下することが示された [50]。

乾癬の発症機序において好中球細胞外トラップ (好中球の DNA からなる網状構造物) がどのような役割を果たしているのかは明らかではない。しかし、最近の研究で、好中球細胞外トラップが IL-36Ra 欠損乾癬モデルマウスで誘導される

ことが示されたため、乾癬様病変の発生に関与している可能性がある [51]。好中球が産生する酵素ミエロペルオキシダーゼ (MPO) をコードする *MPO* 遺伝子の変異のうち、好中球および単球の MPO 欠損を引き起こす変異が GPP と関連することが報告された [6]。マウスおよびヒトの好中球・単球で MPO が欠損すると、好中球の機能が変化し、単球による好中球クリアランス (エフェロサイトーシス) が障害され、好中球が炎症皮膚に長時間留まる傾向が強くなる [6]。MPO 欠損は壊疽性膿皮症患者 1 例で報告されている [52] ため、Sweet 症候群 (急性熱性好中球性皮膚疾患) や壊疽性膿皮症などの好中球に起因する疾患にも関与している可能性がある。また、GPP と表現型が類似している疾患で *MPO* 遺伝子のスクリーニングを行ったところ、肢端部膿疱性乾癬患者 1 例と急性汎発性発疹性膿疱症患者 2 例で疾患アレルが確認され、*MPO* 変異が他の炎症性皮膚疾患に関与している可能性がさらに裏づけられた。その後行われた英国 Biobank データの解析で、一般集団において疾患アレル c.20312A>C および c.1705C>T (p.Arg569Trp) が好中球数増加と関連することも示された [53]。

動物実験で、IL-36Ra が創傷治癒においても中心的役割を果たしていることが示された。*IL-36RN<sup>-/-</sup>* マウスでは創傷治癒が遅延したが、TLR4 阻害薬を投与すると創傷治癒への影響が消失した [54]。また、*IL-36RN<sup>-/-</sup>* マウスでは皮膚虚血再灌流障害が悪化したが、TLR4 阻害薬または PAD4 阻害薬を投与すると皮膚虚血再灌流障害への影響が消失した [55]。さらに、動物モデルを用いた最近の研究で、IL-36Ra 欠損がリンパ節での T 細胞プライミングに関わっている可能性が示され、IL-36 が ACD の発症機序に関与していると示唆される [56]。また、広く使用されている 1-フルオロ-2,4-ジニトロベンゼンを用いた接触過敏症のマウスモデルで、IL-36 $\alpha$ 、IL-36 $\beta$  および IL-36 $\gamma$  は疾患表現型に影響しないことが示され、プライミングおよび/または炎症反応の増幅だけがこれらのサイトカインの役割と考えられる [56]。

## 考察

GPP は今なお治療に難渋する疾患で、確実な有用性が確認された治療選択肢はほとんどない。近年、炎症性疾患の分子メカニズムに対する理解が深まり、GPP と関連する遺伝子変異がいくつか確認されたことから、GPP の管理や治療に対する新たな標的が発見されてきた。GPP 患者が保有している注目すべき遺伝子変異の 1 つに、IL-36Ra をコードする *IL36RN* 遺伝子の機能喪失変異がある。GPP では IL-36 経路が相対的に活性化しているため、GPP の発症機序においてハブとなる IL-36 が GPP に対する薬物療法の最も重要な標的と考えられる。急性期 GPP 患者に対する臨床試験で、抗 IL-36R モノクローナル抗体製剤スベソリマブは投与開始後 1 週間以内に奏効していることから [37]、IL-36 標的療法の proof-of-principle (PoP) は実証されている。抗 IL-36R モノクローナル抗体製剤イムシドリマブの GPP 患者 8 例を対象とした非盲検試験の中間解析の結果からも、同じく IL-36 が GPP の発症機序において中心的役割を果たしていることが支持される [38]。

総括すると、GPP の発症機序の分子メカニズムに対する理解が深まり、臨床的妥当性が確認された新たな薬物療法の標的が発見された結果、IL-36 が GPP の発症および進行を促すハブと考えられる (図 2)。IL-36 がケラチノサイトまたは炎症細胞から分泌されてオートクリン型経路およびパラクリン型経路が刺激されると、いくつかの主要なサイトカイン (IL-8、CXCL1、CXCL2、CCL20、IL-12、IL-1 $\beta$ 、IL-23、IL-6 および TNF- $\alpha$ ) を介した自己炎症反応および自己免疫反応が増強される。これらのサイトカインがさらに T 細胞を活性化し、IL-22、IL-17 および IFN- $\gamma$  が分泌される。さらに、活性化した好中球が遊走し、好中球を介した炎症誘発性サイトカインの生成と活性化を引き起こすことでさらに炎症メカニズムを増強するため、好中球性皮膚疾患である GPP が発症する。

他の自己炎症性皮膚疾患への IL-36 経路の関与も最近明らかにされ、IL-36 がこれらの疾患を誘発する自己炎症性メカニズムを統合するハブとして機能することは確実と考えられている。IL-36 サイトカインがケラチノサイトおよび APC の活

性化や T 細胞の増殖に関与していることを示唆するエビデンスが集積してきている [48]。これらの知見により、例えば *IL36RN* 変異のある患者が黄色ブドウ球菌感染などの誘発因子によって GPP 急性期症状を発症しやすい理由について論理的に説明することができる。IL-36 サイトカインは、稀少な炎症性皮膚疾患である Netherton 症候群の発症機序にも関与することがわかっており [49]、さらに、ACD の発症機序にも関与している可能性が示唆されている [50]。これらの知見に基づき、ACD や好中球細胞外トラップで誘発される稀少疾患 (急性熱性好中球性皮膚疾患および壊疽性膿皮症など) に対する新規治療薬が創出される可能性がある。TLR4 の役割など、創傷治癒メカニズムにおける IL-36 サイトカインの制御機構をさらに解明できれば、IL-36R 標的薬以外の新規治療薬の開発にもつながると期待される。

## 結論

本稿をまとめると、近年、GPP の発症機序に関しては IL-36 がハブとして機能していることなど、その遺伝学的および分子的機構の理解が深まった。これを契機として、これまでアンメットメディカルニーズと扱われてきた GPP およびその他の自己炎症性皮膚疾患に対する新規の革新的治療薬の開発が進められているところである。

## 謝辞

**資金の提供** 著者は本稿執筆に関連する謝礼を受領していない。Boehringer Ingelheim が本誌の Rapid Service 料を支払った。

**メディカルライティング支援** OPEN Health Communications (ロンドン、英国) の Yasser Heakal, PhD がメディカルライティング、編集およびフォーマット調整のサポートを行い、この費用は Boehringer Ingelheim との契約に基づき同社が負担した。Boehringer Ingelheim が、医学・科学的見地から内容の正確さや知的財産権の侵害の有無について、原稿を審査した。

**オーサiership** 著者は医学雑誌編集者国際委員会 (ICMJE) の著者基準を満たし、草稿を執筆し、投稿を決定した。

**著者の貢献** 著者が本稿の企画、構成の検討および草稿執筆を行った。また著者が最終原稿を読み、承認した。

**倫理ガイドラインの遵守** 本稿は過去に実施された試験や個人的経験に基づくもので、著者が被験者または動物を対象に新たに実施した試験は含まれていない。

**開示事項** 著者は以下からコンサルタント料および講演料を受領したことがある：AbbVie GK、Amgen Inc.、Bristol Myers Squibb、Eisai Co., Ltd.、Eli Lilly Japan、Janssen Pharmaceutical、Kaken Pharmaceutical Co., Ltd.、Kyowa Hakko Kirin Co., Ltd.、LEO Pharma Japan、Maruho Co., Ltd.、Minophagen Pharmaceutical Co., Ltd.、Nippon Boehringer Ingelheim Co., Ltd.、Nippon Zoki Pharmaceutical Co., Ltd.、Novartis Pharma、TAIHO Pharmaceutical Co., Ltd.、Tsumura Co., Ltd.、Sanofi、Sato Pharmaceutical Co., Ltd.、Sun Pharmaceutical Industries、Torii Pharmaceutical Co., Ltd. および UCB Pharma。

**オープンアクセス** 本論文は Creative Commons Attribution-NonCommercial 4.0 International License の下で公開されている。本ライセンスは、原著者および情報源を適切に明示し、Creative Commons ライセンスへのリンクを示し、改変の有無を表示する限りは、いかなる媒体およびフォーマットでの非営利的使用、共有、改変、配布および複製をも許可するものである。本論文の Creative Commons ライセンスは本論文に含まれる画像や他の第三者の素材にも適用されるが、素材のクレジットラインに別途記載がある場合はこの限りではない。本論文の Creative Commons ライセンスが素材に適用されず、使用目的が法的規制で認められないか許容範囲を超えている場合には、著作権者から直接許可を得る必要がある。このライセンスの詳細は以下のウェブサイトでご覧

できる。<http://creativecommons.org/licenses/by-nc/4.0/>

## REFERENCES

1. Navarini AA, Burden AD, Capon F, et al. European consensus statement on phenotypes of pustular psoriasis. *J Eur Acad Dermatol Venereol*. 2017;31(11):1792–9.
2. Gooderham MJ, Van Voorhees AS, Lebwohl MG. An update on generalized pustular psoriasis. *Expert Rev Clin Immunol*. 2019;15(9):907–19.
3. Leung YY, Ogdie A, Orbai AM, et al. Classification and outcome measures for psoriatic arthritis. *Front Med (Lausanne)*. 2018;5:246.
4. Bachelez H. Pustular psoriasis: the dawn of a new era. *Acta Derm Venereol*. 2020;100(3):adv00034.
5. Benjegerdes KE, Hyde K, Kivelevitch D, Mansouri B. Pustular psoriasis: pathophysiology and current treatment perspectives. *Psoriasis (Auckl)*. 2016;6:131–44.
6. Zhou J, Luo Q, Cheng Y, Wen X, Liu J. An update on genetic basis of generalized pustular psoriasis (review). *Int J Mol Med*. 2021;47(6):118.
7. Sugiura K, Oiso N, Iinuma S, et al. IL36RN mutations underlie impetigo herpetiformis. *J Invest Dermatol*. 2014;134(9):2472–4.
8. Fujita H, Terui T, Hayama K, et al. Japanese guidelines for the management and treatment of generalized pustular psoriasis: the new pathogenesis and treatment of GPP. *J Dermatol*. 2018;45(11):1235–70.
9. Akiyama M, Takeichi T, McGrath JA, Sugiura K. Autoinflammatory keratinization diseases. *J Allergy Clin Immunol*. 2017;140(6):1545–7.
10. Akiyama M, Takeichi T, McGrath JA, Sugiura K. Autoinflammatory keratinization diseases: an emerging concept encompassing various inflammatory keratinization disorders of the skin. *J Dermatol Sci*. 2018;90(2):105–11.
11. Hoegler KM, John AM, Handler MZ, Schwartz RA. Generalized pustular psoriasis: a review and update on treatment. *J Eur Acad Dermatol Venereol*. 2018;32(10):1645–51.

12. Imafuku S, Honma M, Okubo Y, et al. Efficacy and safety of secukinumab in patients with generalized pustular psoriasis: a 52-week analysis from phase III open-label multicenter Japanese study. *J Dermatol*. 2016;43(9):1011–7.
13. Saeki H, Nakagawa H, Ishii T, et al. Efficacy and safety of open-label ixekizumab treatment in Japanese patients with moderate-to-severe plaque psoriasis, erythrodermic psoriasis and generalized pustular psoriasis. *J Eur Acad Dermatol Venereol*. 2015;29(6):1148–55.
14. Sano S, Kubo H, Morishima H, Goto R, Zheng R, Nakagawa H. Guselkumab, a human interleukin-23 monoclonal antibody in Japanese patients with generalized pustular psoriasis and erythrodermic psoriasis: efficacy and safety analyses of a 52-week, phase 3, multicenter, open-label study. *J Dermatol*. 2018;45(5):529–39.
15. Wilsmann-Theis D, Schnell LM, Ralser-Isselstein V, et al. Successful treatment with interleukin-17A antagonists of generalized pustular psoriasis in patients without IL36RN mutations. *J Dermatol*. 2018;45(7):850–4.
16. Yamasaki K, Nakagawa H, Kubo Y, Ootaki K, Japanese Brodalumab Study G. Efficacy and safety of brodalumab in patients with generalized pustular psoriasis and psoriatic erythroderma: results from a 52-week, open-label study. *Br J Dermatol*. 2017;176(3):741–51.
17. McKeage K, Duggan S. Risankizumab: first global approval. *Drugs*. 2019;79(8):893–900.
18. Choon SE, Lebwohl MG, Marrakchi S, et al. Study protocol of the global Effisayil 1 Phase II, multicentre, randomised, double-blind, placebo-controlled trial of spesolimab in patients with generalized pustular psoriasis presenting with an acute flare. *BMJ Open*. 2021;11(3):e043666.
19. Sugiura K. The genetic background of generalized pustular psoriasis: IL36RN mutations and CARD14 gain-of-function variants. *J Dermatol Sci*. 2014;74(3):187–92.
20. Frey S, Sticht H, Wilsmann-Theis D, et al. Rare Loss-of-function mutation in SERPINA3 in generalized pustular psoriasis. *J Invest Dermatol*. 2020;140(7):1451–5.
21. Johnston A, Xing X, Wolterink L, et al. IL-1 and IL-36 are dominant cytokines in generalized pustular psoriasis. *J Allergy Clin Immunol*. 2017;140(1):109–20.
22. Murrieta-Coxca JM, Rodriguez-Martinez S, Cancino-Diaz ME, Markert UR, Favaro RR, Morales-Prieto DM. IL-36 cytokines: regulators of inflammatory responses and their emerging role in immunology of reproduction. *Int J Mol Sci*. 2019;20(7):1649.
23. Rivers-Auty J, Daniels MJD, Colliver I, Robertson DL, Brough D. Redefining the ancestral origins of the interleukin-1 superfamily. *Nat Commun*. 2018;9(1):1156.
24. Yamamoto M, Imai Y, Sakaguchi Y, Haneda T, Yamanishi K. Serum cytokines correlated with the disease severity of generalized pustular psoriasis. *Dis Markers*. 2013;34(3):153–61.
25. Henry CM, Sullivan GP, Clancy DM, Afonina IS, Kulms D, Martin SJ. Neutrophil-derived proteases escalate inflammation through activation of IL-36 family cytokines. *Cell Rep*. 2016;14(4):708–22.
26. Clancy DM, Sullivan GP, Moran HBT, et al. Extracellular neutrophil proteases are efficient regulators of IL-1, IL-33, and IL-36 cytokine activity but poor effectors of microbial killing. *Cell Rep*. 2018;22(11):2937–50.
27. Goldstein JD, Bassoy EY, Caruso A, et al. IL-36 signaling in keratinocytes controls early IL-23 production in psoriasis-like dermatitis. *Life Sci Alliance*. 2020;3(6):e202000688.
28. Song HS, Kim SJ, Park TI, Jang YH, Lee ES. Immunohistochemical comparison of IL-36 and the IL-23/Th17 axis of generalized pustular psoriasis and acute generalized exanthematous pustulosis. *Ann Dermatol*. 2016;28(4):451–6.
29. Buhl AL, Wenzel J. Interleukin-36 in infectious and inflammatory skin diseases. *Front Immunol*. 2019;10:1162.
30. Yilmaz SB, Cicek N, Coskun M, Yegin O, Alpsoy E. Serum and tissue levels of IL-17 in different clinical subtypes of psoriasis. *Arch Dermatol Res*. 2012;304(6):465–9.
31. Plachouri KM, Chourdakis V, Georgiou S. The role of IL-17 and IL-17 receptor inhibitors in the management of generalized pustular psoriasis. *Drugs Today (Barc)*. 2019;55(9):587–93.
32. Landry M, Muller SA. Generalized pustular psoriasis. Observations on the course of the disease in a familial occurrence. *Arch Dermatol*. 1972;105(5):711–6.
33. Marrakchi S, Guigue P, Renshaw BR, et al. Interleukin-36-receptor antagonist deficiency and generalized pustular psoriasis. *N Engl J Med*. 2011;365(7):620–8.
34. Sawabe Y, Hayashi K, Kamata M, et al. Case of generalized pustular psoriasis with coexisting

- mutations in IL36RN and CARD14. *J Dermatol*. 2019;46(10):e368–70.
35. Onoufriadis A, Simpson MA, Pink AE, et al. Mutations in IL36RN/IL1F5 are associated with the severe episodic inflammatory skin disease known as generalized pustular psoriasis. *Am J Hum Genet*. 2011;89(3):432–7.
  36. Arakawa A, Vollmer S, Besgen P, et al. Unopposed IL-36 activity promotes clonal CD4(+) T-cell responses with IL-17A production in generalized pustular psoriasis. *J Invest Dermatol*. 2018;138(6):1338–47.
  37. Bachelez H, Choon SE, Marrakchi S, et al. Inhibition of the interleukin-36 pathway for the treatment of generalized pustular psoriasis. *N Engl J Med*. 2019;380(10):981–3.
  38. AnaptyBio. IMSIDOLIMAB. <https://www.anaptybio.com/pipeline/imsidolimab/>. 2020. Accessed 8 Dec 2021.
  39. Ohko K, Nakajima K, Kataoka S, Takaishi M, Sano S. IL-36 signaling is essential for psoriatic inflammation through the augmentation of innate immune responses. *J Invest Dermatol*. 2019;139(6):1400–4.
  40. Wang W, Yu X, Wu C, Jin H. IL-36gamma inhibits differentiation and induces inflammation of keratinocyte via Wnt signaling pathway in psoriasis. *Int J Med Sci*. 2017;14(10):1002–7.
  41. Farag AGA, Marea AH, Al-Sharakly DR, Al Bahat SM. Interleukin 36 gamma in psoriasis patients an immunohistochemical study. *J Egypt Women's Dermatol Soc*. 2018;15(3):172–8.
  42. Madonna S, Girolomoni G, Dinarello CA, Albanesi C. The significance of IL-36 hyperactivation and IL-36R targeting in psoriasis. *Int J Mol Sci*. 2019;20(13):E3318.
  43. Todorovic V, Su Z, Putman CB, et al. Small molecule IL-36gamma antagonist as a novel therapeutic approach for plaque psoriasis. *Sci Rep*. 2019;9(1):9089.
  44. Catapano M, Vergnano M, Romano M, et al. IL-36 promotes systemic IFN-I responses in severe forms of psoriasis. *J Invest Dermatol*. 2020;140(4):816–26.
  45. Hovhannisyan Z, Liu N, Khalil-Aguero S, et al. Enhanced IL-36R signaling promotes barrier impairment and inflammation in skin and intestine. *Sci Immunol*. 2020;5(54):eaax1686.
  46. Shibata A, Sugiura K, Furuta Y, Mukumoto Y, Kaminuma O, Akiyama M. Toll-like receptor 4 antagonist TAK-242 inhibits autoinflammatory symptoms in DITRA. *J Autoimmun*. 2017;80:28–38.
  47. Fukushima H, Iwata Y, Watanabe S, et al. TAK-242 ameliorates contact dermatitis exacerbated by IL-36 receptor antagonist deficiency. *Sci Rep*. 2020;10(1):734.
  48. Foster AM, Baliwag J, Chen CS, et al. IL-36 promotes myeloid cell infiltration, activation, and inflammatory activity in skin. *J Immunol*. 2014;192(12):6053–61.
  49. Gouin O, Barbieux C, Leturcq F, Bonnet-des-Claustres M, Petrova E, Hovnanian A. Transgenic kallikrein 14 mice display major hair shaft defects associated with desmoglein 3 and 4 degradation, abnormal epidermal differentiation, and IL-36 signature. *J Invest Dermatol*. 2020;140(6):1184–94.
  50. Mattii M, Ayala F, Balato N, et al. The balance between pro- and anti-inflammatory cytokines is crucial in human allergic contact dermatitis pathogenesis: the role of IL-1 family members. *Exp Dermatol*. 2013;22(12):813–9.
  51. Watanabe S, Iwata Y, Fukushima H, et al. Neutrophil extracellular traps are induced in a psoriasis model of interleukin-36 receptor antagonist-deficient mice. *Sci Rep*. 2020;10(1):20149.
  52. Haskamp S, Bruns H, Hahn M, et al. Myeloperoxidase modulates inflammation in generalized pustular psoriasis and additional rare pustular skin diseases. *Am J Hum Genet*. 2020;107(3):527–38.
  53. Vergnano M, Mockenhaupt M, Benzion-Olsson N, et al. Loss-of-function myeloperoxidase mutations are associated with increased neutrophil counts and pustular skin disease. *Am J Hum Genet*. 2021;108(4):757.
  54. Saito K, Iwata Y, Fukushima H, et al. IL-36 receptor antagonist deficiency resulted in delayed wound healing due to excessive recruitment of immune cells. *Sci Rep*. 2020;10(1):14772.
  55. Tanaka Y, Iwata Y, Saito K, et al. Cutaneous ischemia-reperfusion injury is exacerbated by IL-36 receptor antagonist deficiency. *J Eur Acad Dermatol Venereol*. 2021. <https://doi.org/10.1111/jdv.17767>.
  56. Zaladonis A, Zhang X, Manupipatpong KK, Kalaiselvan S, Alvarez P, Jensen LE. Interleukin-36 (IL-36) system in the 1-fluoro-2,4-dinitrobenzene (DNFB) mouse model of allergic contact dermatitis. *Allergy*. 2020;75(8):2078–81.
  57. Zhou LL, Georgakopoulos JR, Ighani A, Yeung J. Systemic monotherapy treatments for generalized pustular psoriasis: a systematic review. *J Cutan Med Surg*. 2018;22(6):591–601.
  58. Haustein UF, Rytter M. Methotrexate in psoriasis: 26 years' experience with low-dose long-term

- treatment. *J Eur Acad Dermatol Venereol.* 2000;14(5):382–8.
59. Yan K, Xu W, Huang Y, et al. Methotrexate restores the function of peripheral blood regulatory T cells in psoriasis vulgaris via the CD73/AMPK/mTOR pathway. *Br J Dermatol.* 2018;179(4):896–905.
  60. Uva L, Miguel D, Pinheiro C, et al. Mechanisms of action of topical corticosteroids in psoriasis. *Int J Endocrinol.* 2012;2012:561018.
  61. Fujisawa T, Suzuki S, Mizutani Y, et al. Granulocyte and monocyte adsorption apheresis for generalized pustular psoriasis: therapeutic outcomes in three refractory patients. *Ther Apher Dial.* 2015;19(4):336–41.
  62. Fu LW, Vender R. Systemic role for vitamin D in the treatment of psoriasis and metabolic syndrome. *Dermatol Res Pract.* 2011;2011:276079.
  63. Wong T, Hsu L, Liao W. Phototherapy in psoriasis: a review of mechanisms of action. *J Cutan Med Surg.* 2013;17(1):6–12.
  64. Ibbotson SH. A perspective on the use of NB-UVB phototherapy vs PUVA photochemotherapy. *Front Med (Lausanne).* 2018;5:184.
  65. Morita A, Yamazaki F, Matsuyama T, et al. Adalimumab treatment in Japanese patients with generalized pustular psoriasis: results of an open-label phase 3 study. *J Dermatol.* 2018;45(12):1371–80.
  66. Wang WM, Jin HZ. Biologics in the treatment of pustular psoriasis. *Expert Opin Drug Saf.* 2020;19(8):969–80.
  67. Gordon KB, Strober B, Lebwohl M, et al. Efficacy and safety of risankizumab in moderate-to-severe plaque psoriasis (UltIMMa-1 and UltIMMa-2): results from two double-blind, randomised, placebo-controlled and ustekinumab-controlled phase 3 trials. *Lancet.* 2018;392(10148):650–61.
  68. Sugiura K, Takemoto A, Yamaguchi M, et al. The majority of generalized pustular psoriasis without psoriasis vulgaris is caused by deficiency of interleukin-36 receptor antagonist. *J Invest Dermatol.* 2013;133(11):2514–21.
  69. Sugiura K, Muto M, Akiyama M. CARD14 c.526G>C (p.Asp176His) is a significant risk factor for generalized pustular psoriasis with psoriasis vulgaris in the Japanese cohort. *J Invest Dermatol.* 2014;134(6):1755–7.
  70. Mercurio L, Morelli M, Scarponi C, et al. IL-38 has an anti-inflammatory action in psoriasis and its expression correlates with disease severity and therapeutic response to anti-IL-17A treatment. *Cell Death Dis.* 2018;9(11):1104.
  71. Cai Y, Xue F, Quan C, et al. A critical role of the IL-1beta-IL-1R signaling pathway in skin inflammation and psoriasis pathogenesis. *J Invest Dermatol.* 2019;139(1):146–56.
  72. Goldbach-Mansky R, Kastner DL. Autoinflammation: the prominent role of IL-1 in monogenic autoinflammatory diseases and implications for common illnesses. *J Allergy Clin Immunol.* 2009;124(6):1141–9.
  73. Afonina IS, Muller C, Martin SJ, Beyaert R. Proteolytic processing of interleukin-1 family cytokines: variations on a common theme. *Immunity.* 2015;42(6):991–1004.
  74. Barbier L, Ferhat M, Salame E, et al. Interleukin-1 family cytokines: keystones in liver inflammatory diseases. *Front Immunol.* 2019;10:2014.
